# Supplementary material for: The presence and impact of reference bias on population genomic studies of prehistoric human populations
Source: PubMed Central journal article supplement (PMC6685638; doi:10.1371/journal.pgen.1008302), 2019-07-26

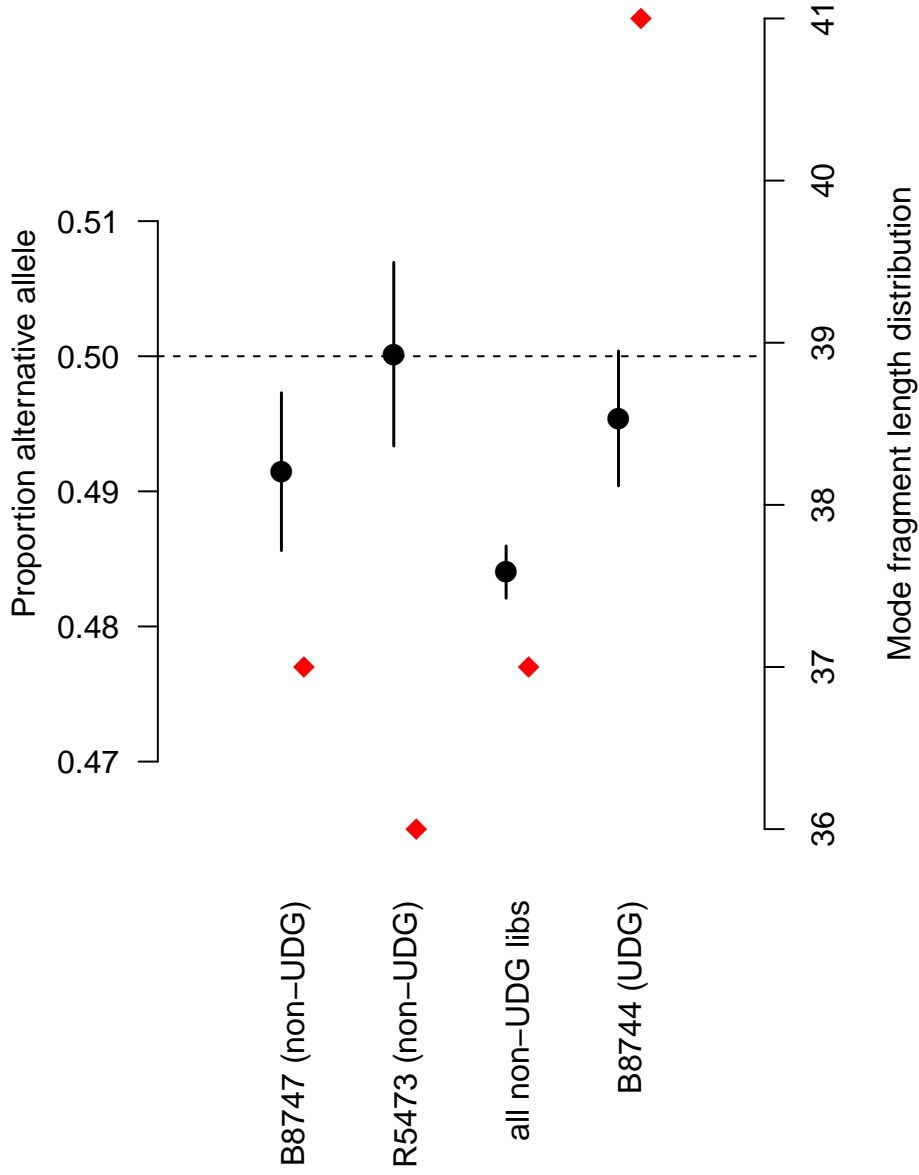

Supplement: pgen.1008302.s002.pdf [file pgen.1008302.s002.pdf]
