# Supplementary material for: The presence and impact of reference bias on population genomic studies of prehistoric human populations
Source: PubMed Central journal article supplement (PMC6685638; doi:10.1371/journal.pgen.1008302), 2019-07-26

D(Chimp, X; sf12\_long, sf12\_dualfilter)

0.010  
0.005  
0.000  
-0.005  
-0.010

Africa America C.Asia/Sib EastAsia Oceania SouthAsia WestEurasia

Region

Z

- $|Z| < 2$
- $|Z| > 2$

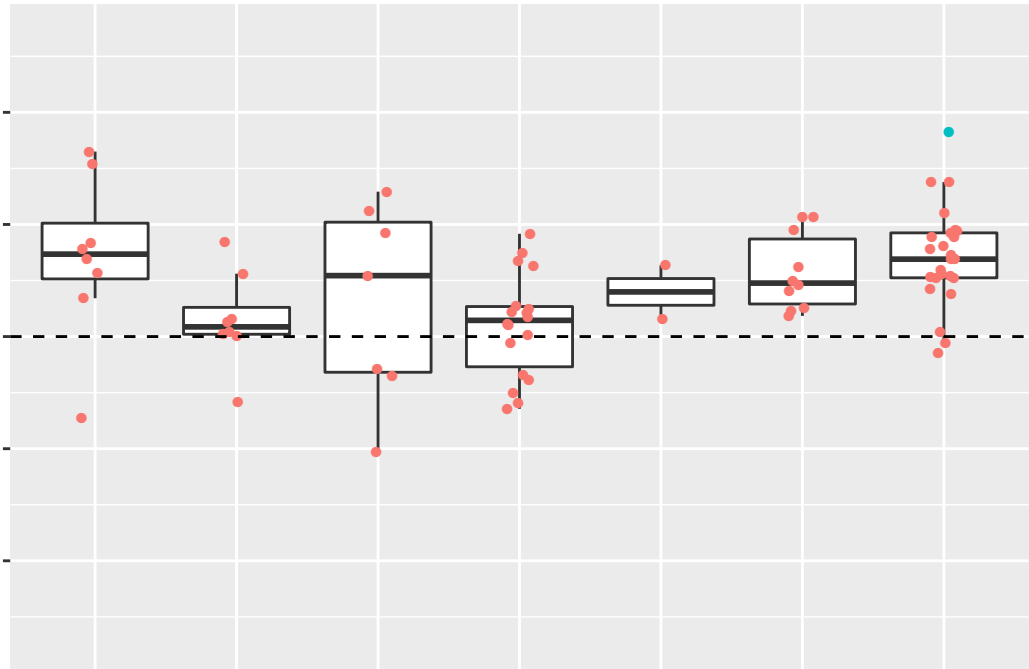

Supplement: pgen.1008302.s005.pdf [file pgen.1008302.s005.pdf]
